# Supplementary material for: Unraveling the COVID-19 hospitalization dynamics in Spain using Bayesian inference
Source: Springer Nature journal article supplement (doi:10.1186/s12874-023-01842-7), 2023-01-25
Supplement: MOESM1 [file 23953538]

1 **Supporting Information: Unraveling the COVID-19 hospitalization dynamics in Spain**  
2 **using Bayesian inference**

3 Alberto Aleta, PhD<sup>1,4</sup>, Juan Luis Blas-Láina, M.D<sup>2</sup>, Gabriel Tirado Anglés, M.D<sup>3</sup>, and Yamir Moreno, Prof.<sup>4,5,6,7</sup>

4 1 ISI Foundation, Via Chisola 5, Torino 10126, Italy

5 2 Servicio de Cirugía General y Aparato Digestivo (Jefe de Servicio), Hospital Royo Villanova, Av San Gregorio  
6 s/n, 50015, Zaragoza, Spain

7 3 Unidad de Cuidados Intensivos (Jefe de Servicio), Hospital Royo Villanova, Av San Gregorio s/n, 50015,  
8 Zaragoza, Spain

9 4 Institute for Biocomputation and Physics of Complex Systems (BIFI), University of Zaragoza, Zaragoza 50018,  
10 Spain

11 5 Department of Theoretical Physics, University of Zaragoza, Zaragoza, Spain

12 6 Centai Institute, Torino 10138, Italy

13 7 Complexity Science Hub, Vienna 1080, Austria

14 **Contents**

15 Estimation of the model parameters..... 2  
16 Surveillance data in Aragon..... 3  
17 Regional results..... 5  
18 Robustness of the results..... 8

19  
20  
21  
22  
23  
24  
25  
26  
27  
28  
29  
30  
31  
32  
33

34 **Estimation of the model parameters**

35 The prior and posterior distributions of the parameters for the region of Aragon are shown in figure S1. In table S1,  
36 we report the specific values obtained in the fitting, and figure S2 the corresponding distributions for the admission  
37 interval and the length of stay (LoS).

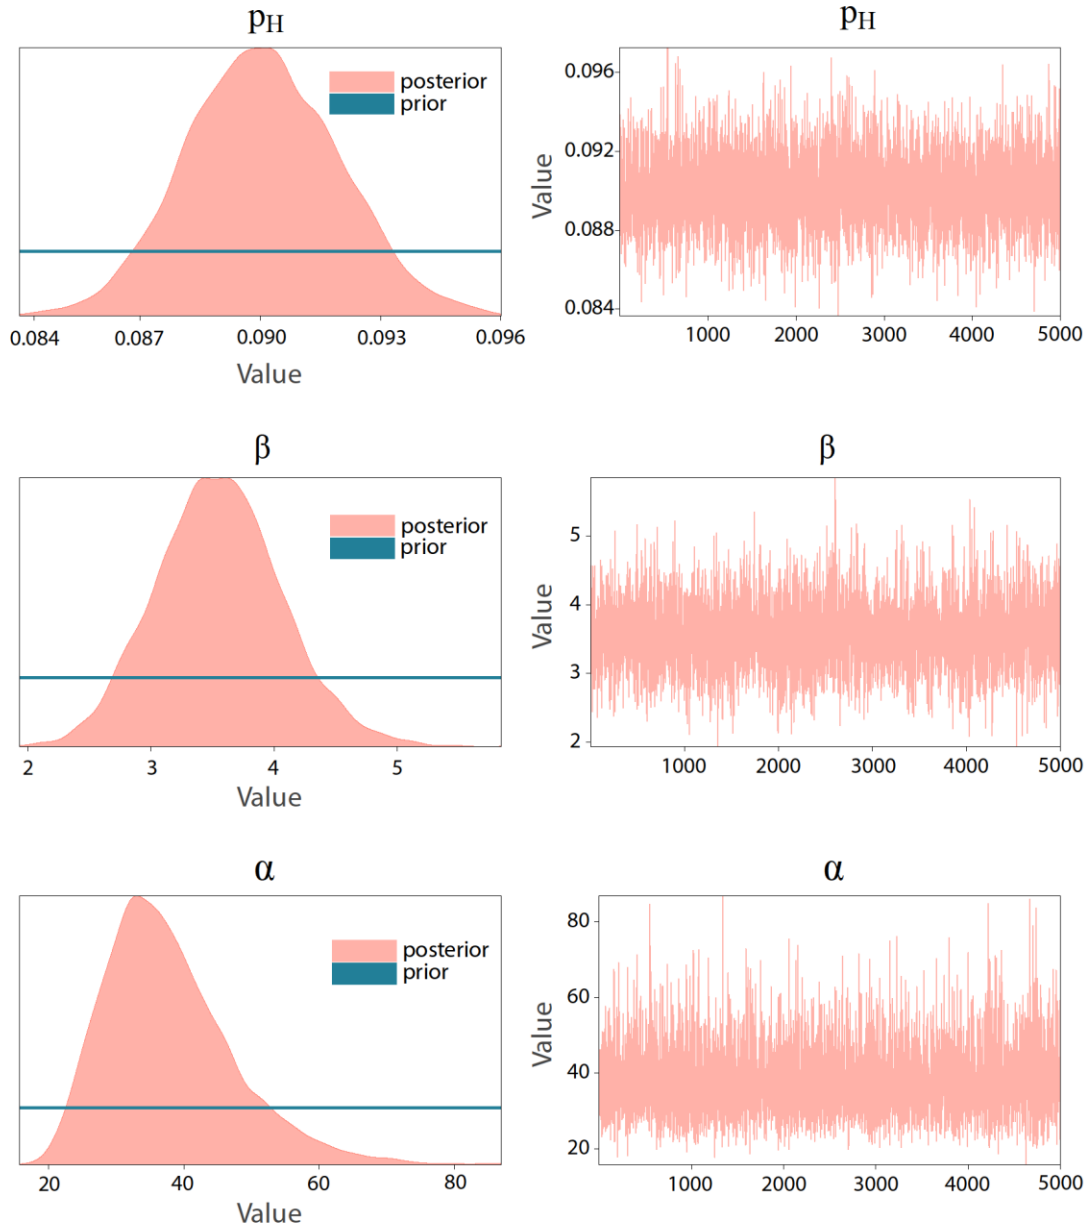

38

39 Figure S1: Prior and posterior distributions. Left column: prior and posterior distributions of the model parameters  
40 for new admissions in the region of Aragon. Right column: MCMC iterations. In all cases, the parameters were  
41 estimated for the region of Aragon using data from July 1 to December 1 2020 and their associated  $\hat{R}$  was 1.0.

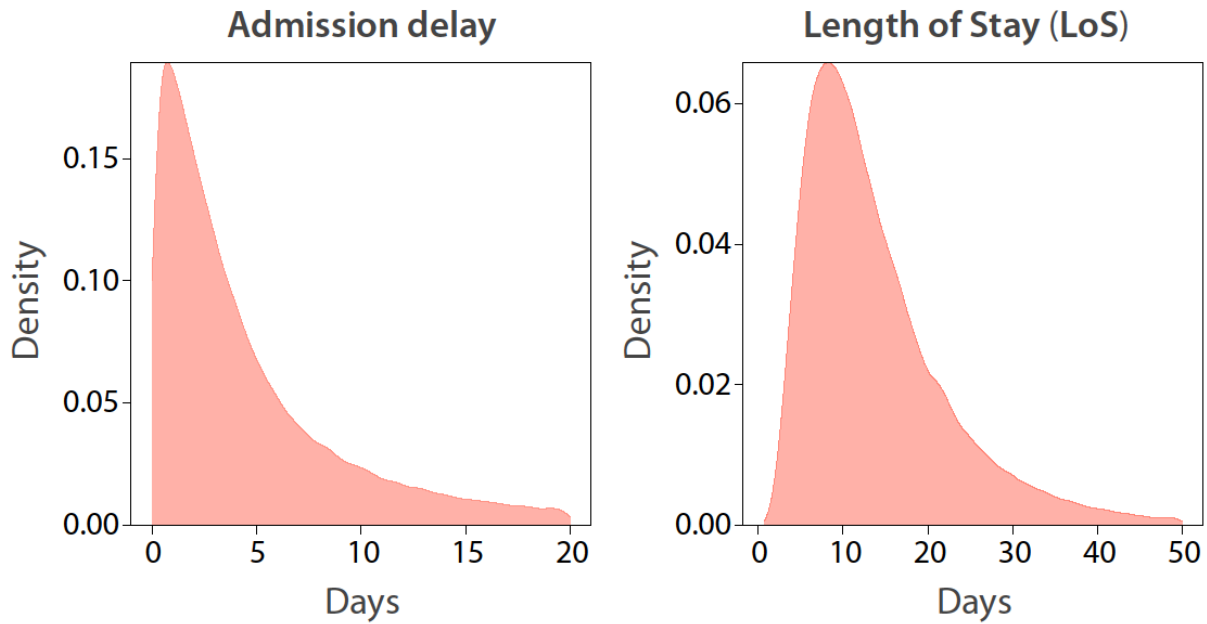

42

43 Figure S2: Time-interval distributions. Left: delay between symptom onset and hospital admission. Right:  
44 distribution of the Length of Stay (LoS) in the hospital.

| Parameter     | Mean  | HDI 2.5% | HDI 97.5% | $\hat{R}$ |
|---------------|-------|----------|-----------|-----------|
| $p_H^{AR}$    | 0.090 | 0.086    | 0.094     | 1.0       |
| $\beta^{AR}$  | 3.557 | 2.579    | 4.564     | 1.0       |
| $\mu^{AR}$    | 2.476 | 2.441    | 2.512     | 1.0       |
| $\sigma^{AR}$ | 0.620 | 0.554    | 0.688     | 1.0       |

45 Table S1: Estimated parameters for the region of Aragon. The probability of being admitted into the hospital upon  
46 being detected is  $p_H$ . The distribution governing the delay between case detection and admission is a Half-Cauchy  
47 distribution parameterized with  $\beta$ . The distribution on the length of stay (LoS) is modeled using a Log-Normal  
48 distribution parameterized with an average of  $\mu$  and standard deviation  $\sigma$ .

49 **Surveillance data in Aragon**

50 In figure S3, we show the evolution of the reproduction number from July 1 2020 to December 1 2020 obtained  
51 from the incidence data provided by the regional government. In figure S4, we depict the age profile of the  
52 individuals admitted each week into any hospital in Aragon since vaccination started.

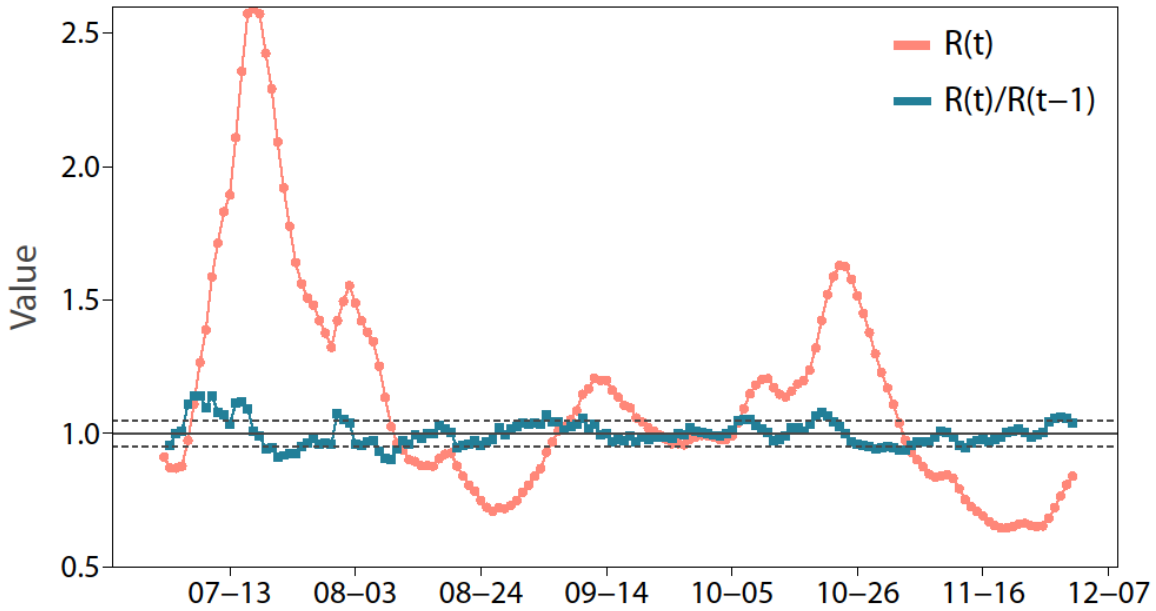

53

54 Figure S3: Estimated reproduction number as a function of time,  $R(t)$ , in Aragon. Circles represent the value of the  
 55 reproduction number while squares show the quotient between the value at time  $t$  over the value on the previous  
 56 day,  $R(t)/R(t - 1)$ . Dashed, horizontal lines represent the values of 0.95 and 1.05.

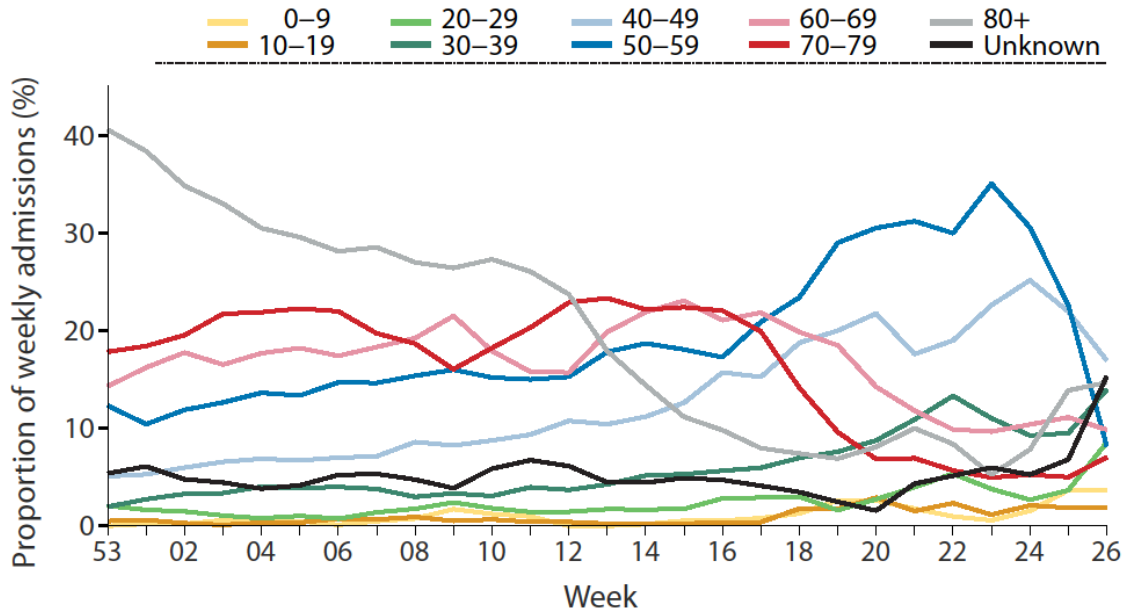

57

58 Figure S4: Age profile of hospital admissions. Proportion of weekly admissions corresponding to each age group in  
 59 Aragon since vaccination started (week 53 of 2020). The curves have been smoothed using a rolling average of size  
 60 3.

61

62 **Regional results**

63 In figure S5, we show the number of new hospital admissions in each autonomous region in Spain, together with the  
 64 prediction of the model. The mean absolute percentage error (MAPE) of the prediction for the third wave is  
 65 presented in table S2. MAPE is defined as:

66 
$$MAPE = \frac{100\%}{n} \sum_{t=1}^n \left| \frac{A_t - F_t}{A_t} \right|,$$

67 where  $A_t$  and  $F_t$  are the actual and forecasted values at time  $t$ , respectively.

| Autonomous Region              | ISO Code | MAPE (%) |          |       |       |
|--------------------------------|----------|----------|----------|-------|-------|
|                                |          | January  | February | March | April |
| Andalusia                      | AN       | 6.94     | 8.87     | 7.58  | 6.65  |
| Aragon                         | AR       | 5.60     | 5.27     | 5.09  | 4.71  |
| Principality of Asturias       | AS       | 59.54    | 61.59    | 53.47 | 49.69 |
| Canary Islands                 | CN       | 7.41     | 7.00     | 7.51  | 7.51  |
| Cantabria                      | CB       | 18.98    | 18.18    | 19.43 | 20.47 |
| Castille-La Mancha             | CM       | 10.48    | 7.27     | 5.63  | 4.37  |
| Castille and León              | CL       | 5.01     | 4.53     | 3.93  | 4.09  |
| Catalonia                      | CT       | 4.79     | 5.36     | 4.61  | 4.08  |
| Extremadura                    | EX       | 36.65    | 35.93    | 31.29 | 29.17 |
| Galicia                        | GA       | 2.47     | 2.63     | 2.37  | 2.37  |
| Balearic Islands               | IB       | 15.43    | 10.15    | 10.59 | 12.60 |
| La Rioja                       | RI       | 19.50    | 17.46    | 14.77 | 13.50 |
| Community of Madrid            | MD       | 20.13    | 30.38    | 32.27 | 32.02 |
| Region of Murcia               | MC       | 13.84    | 19.62    | 17.13 | 15.44 |
| Chartered Community of Navarre | NC       | 9.92     | 7.94     | 6.96  | 6.22  |
| Basque Country                 | PV       | 7.30     | 6.34     | 7.40  | 8.12  |
| Valencian Community            | VC       | 8.97     | 12.72    | 13.88 | 15.20 |

68 Table S2: Forecast quality in each autonomous region. For each region, the MAPE is estimated using the cumulative  
 69 number of admissions up to the month represented in the table. In regions with high MAPE might have undergone  
 70 changes in their contact tracing and testing procedures either during the training process or during the prediction  
 71 phase.

72 In figure S6, we compare the data on cases and hospitalizations in Catalonia provided by the regional government  
 73 and the central government. Lastly, in figure S7, we test the hypothesis that the differences in  $p_H$  across regions  
 74 could be related to the fraction of their population over 64 y.o. Note that there is a clear outlier, the Principality of  
 75 Asturias (AS). If we remove it, the Pearson correlation is 0.23 with p-value = 0.39, rejecting the correlation.  
 76 Similarly, the Spearman correlation yields 0.43 with p-value = 0.085 if we include AS, and 0.32 with p-value = 0.23  
 77 if we exclude it, once again rejecting the hypothesis. These correlations were computed using R 4.2.1.

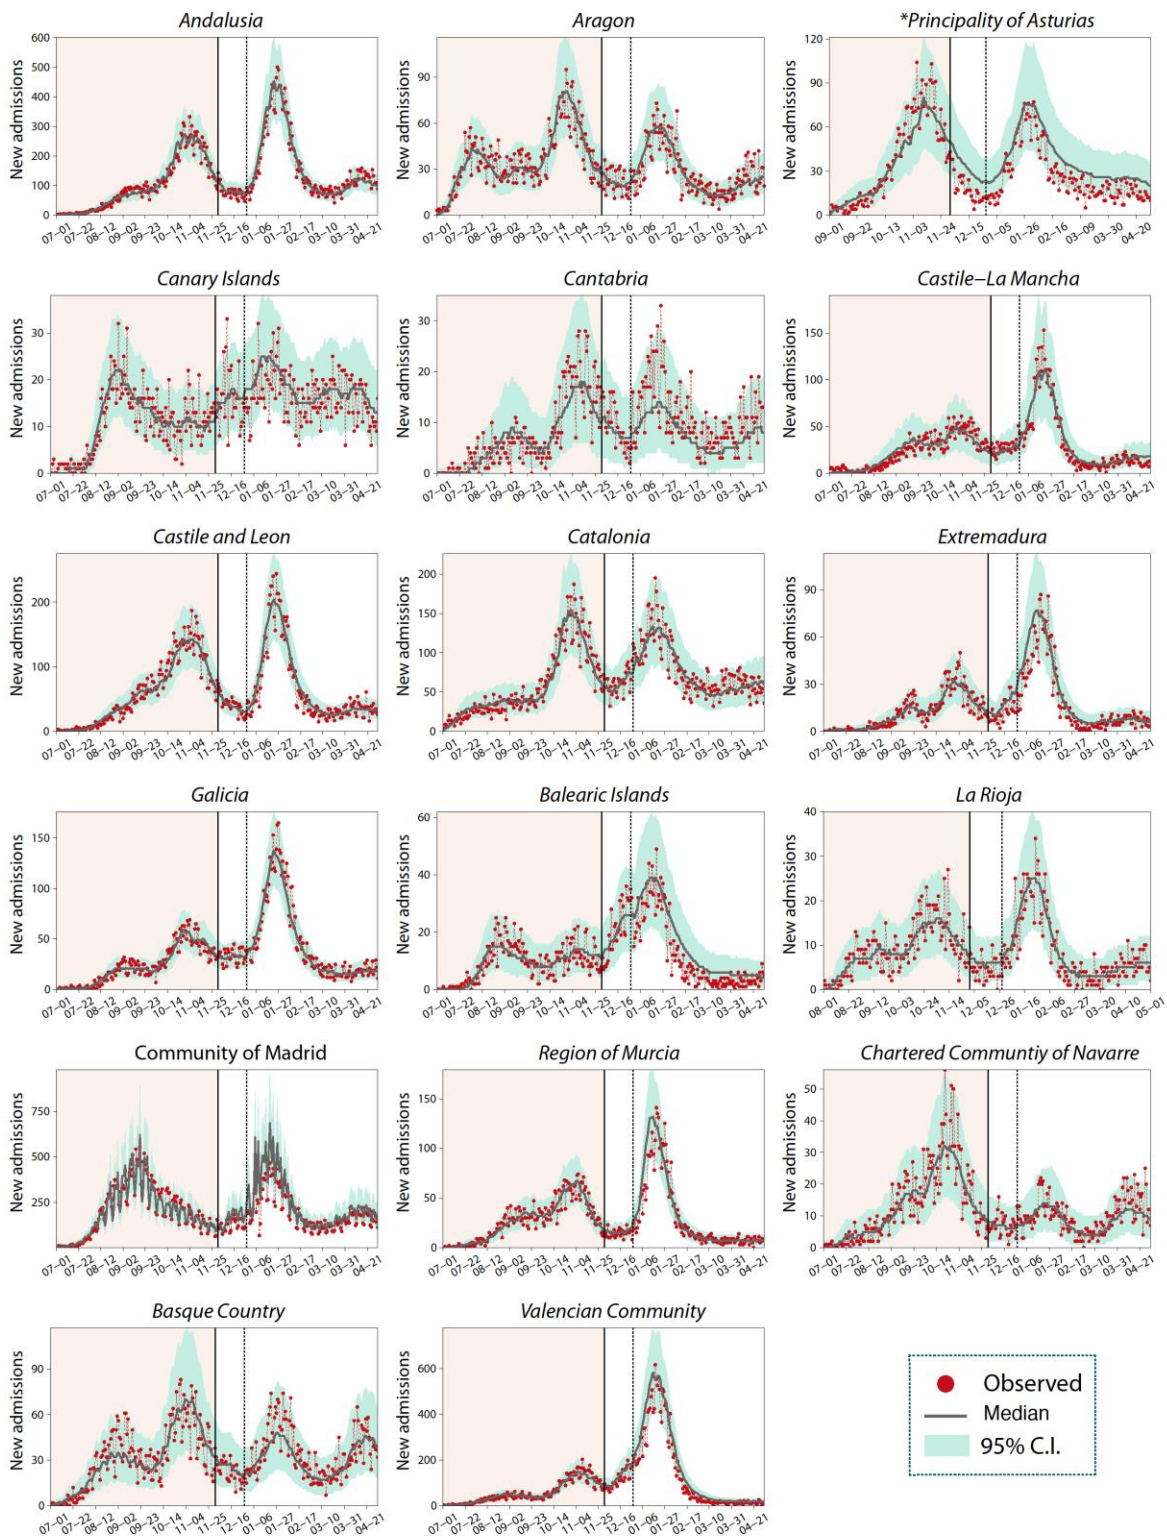

78

79 Figure S5: Number of daily admissions to hospital in each autonomous region. To estimate the parameters of the  
 80 model, we use the information before December 1 2020. From December 1 the number of admissions is obtained  
 81 using the estimated parameters for each region and the daily incidence. The solid line indicates the end of the  
 82 training period and the dashed line the beginning of vaccine roll-out.

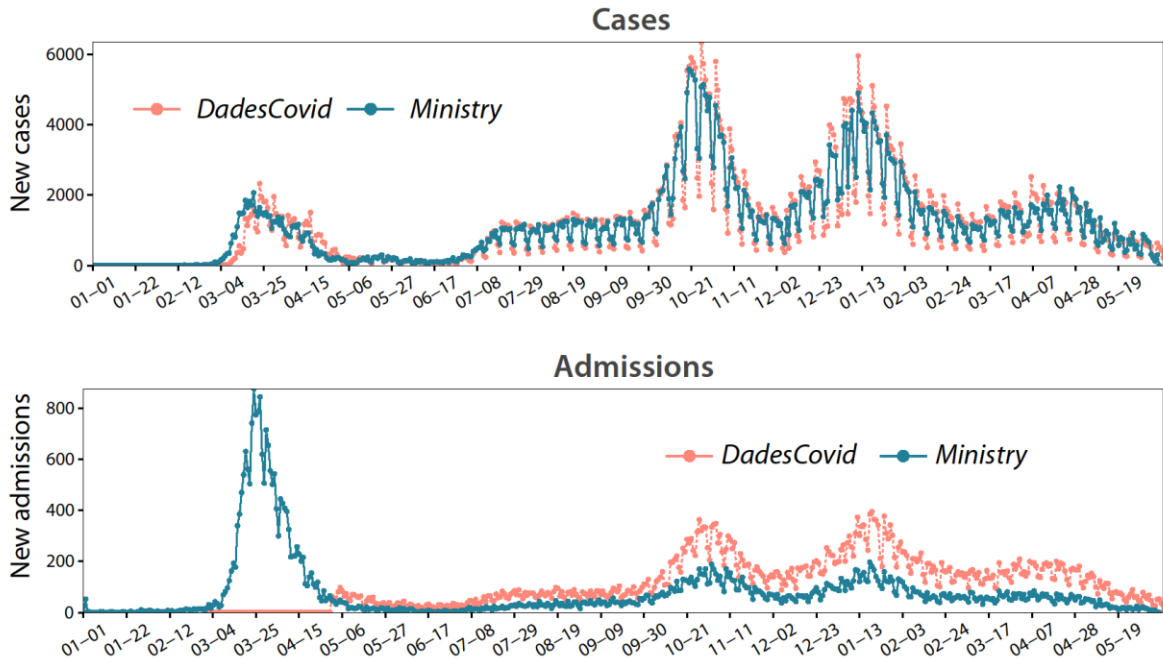

83

84 Figure S6: Comparison between the regional and national data for Catalonia. Top: number of new cases reported by  
 85 DadesCovid (open data portal of the regional government) and by the Spanish Ministry of health. Bottom: number  
 86 of new hospital admissions. Even though the number of new cases reported by both institutions agree, the number of  
 87 new hospitalizations reported by the regional government is twice as large as the one reported by the ministry.

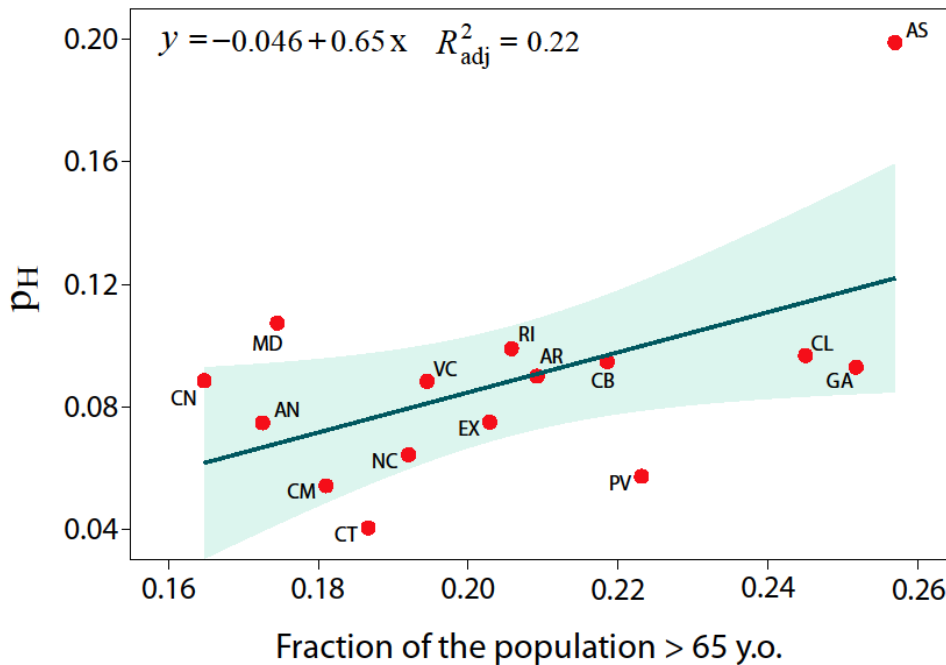

88

89 Figure S7: Effect of the regional age distribution on the admission probability. Correlation between the estimated  
 90 value of  $p_H$  in each region and the fraction of the population older than 65 years old. We obtain  $R^2 = 0.22$  signaling  
 91 that the regression is not able to explain these differences. Furthermore, if we remove the data from the Principality  
 92 of Asturias (AS) the correlation disappears completely.

93 **Robustness of the results**

94 We selected the Half-Cauchy and Log-Normal distributions used in the model based on the AIC value extracted  
 95 from fitting several distributions to the data of Aragón. However, the differences were small and there is no  
 96 underlying mechanistic reason that would make us choose one distribution over the others. As such, in this section  
 97 we test the robustness of our method, repeating the analysis with other distributions for the admission and discharge  
 98 processes.

99 In particular, we have changed the Half-Cauchy distribution to an Exponential distribution:

100 
$$f(x|\lambda) = \lambda \exp\{-\lambda x\}, \tag{S1}$$

101 where  $\lambda$  is the rate parameter. Similarly, we tested a Gamma distribution for the LoS:

102 
$$f(x|\alpha, \beta) = \frac{\beta^\alpha x^{\alpha-1} e^{-\beta x}}{\Gamma(\alpha)}, \tag{S1}$$

103 where  $\alpha$  is the shape parameter and  $\beta$  is the rate parameter.

104 In figure S8, we show the distributions obtained with this method, compared to the ones used in the main text (figure  
 105 S2). The vertical dashed lines represent the median value of the distribution. We observe some differences in the  
 106 shape of the distributions, as expected given their different functional form. Nonetheless, the median value is very  
 107 similar in both cases, signaling that the model is robust to this choice and tends to accommodate the proposed  
 108 distributions to the hidden underlying dynamics.

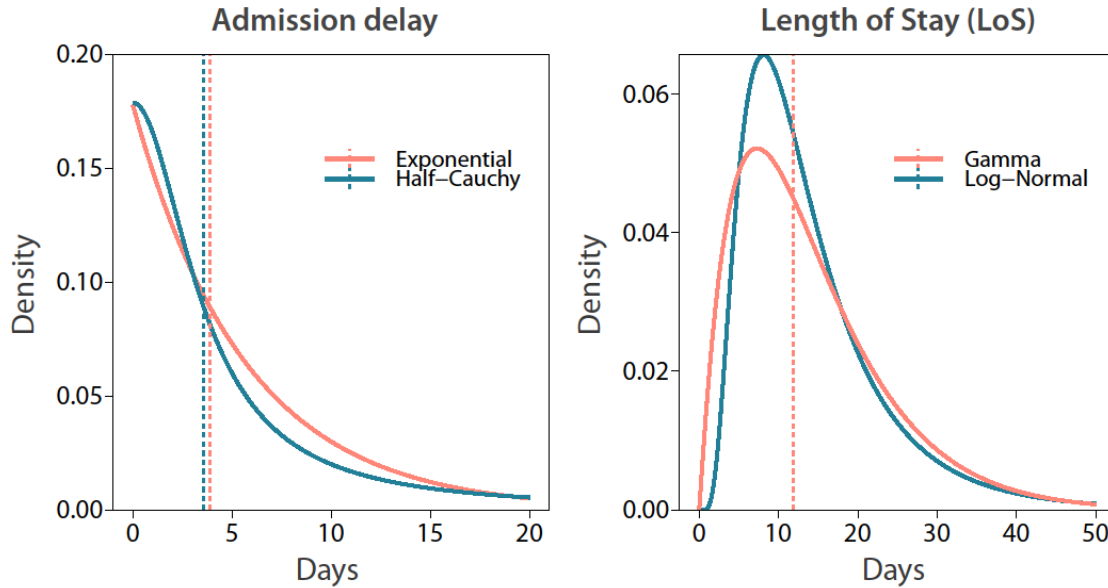

109 Figure S8: Robustness of the time-interval distributions. Left: delay between symptom onset and hospital admission.  
 110 The Half-Cauchy distribution used in the main text is compared with an Exponential distribution fitted to the data  
 111 (rate parameter 0.178 [0.143-0.217]). Right: distribution of the Length of Stay (LoS) in the hospital. The Log-  
 112 Normal distribution used in the main text is compared with a Gamma distribution fitted to the data (shape parameter:  
 113 2.058 [1.659-2.486]; rate parameter: 0.145 [0.116-0.176]). In both plots the vertical, dashed line indicates the  
 114 median value of the distribution. Note that the median values for the LoS are completely overlapped.  
 115

116  
 117  
 118



119 Figures S9 and S10 show the estimated admissions and bed occupancy, respectively, using the new distributions  
 120 (Exponential for the admissions and Gamma for the LoS). We observe that the model can estimate adequately both  
 121 quantities, with results equivalent to the ones presented in the main text. The estimated admission probability is  
 122 0.087 [0.083 – 0.090] while in the original model it was 0.090 [0.086-0.094].

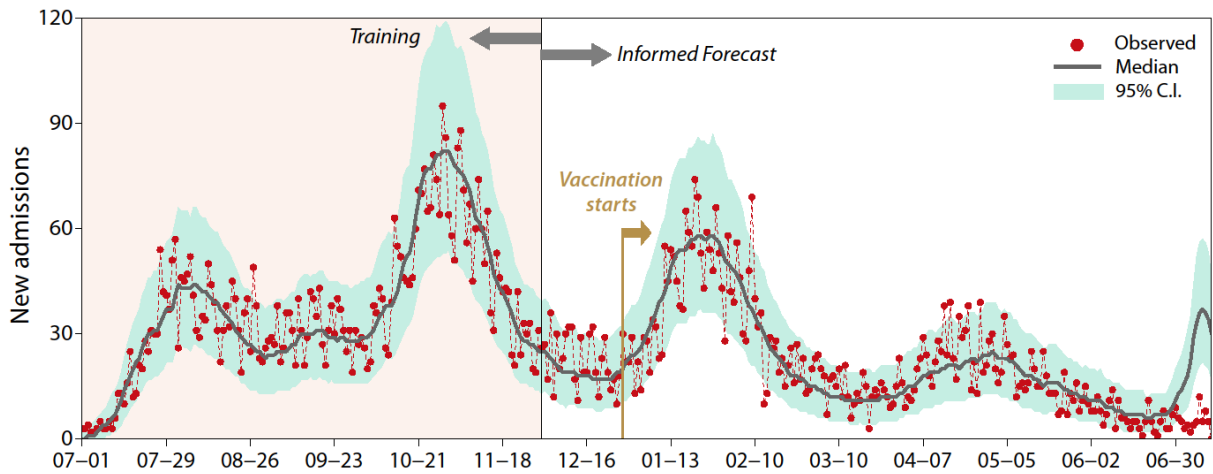

123  
 124 Figure S9: Number of daily admissions to hospitals in the region of Aragon using an Exponential distribution for the  
 125 admission delay. The estimated admission probability upon detection is  $p_H = 0.087$  [0.083-0.090].

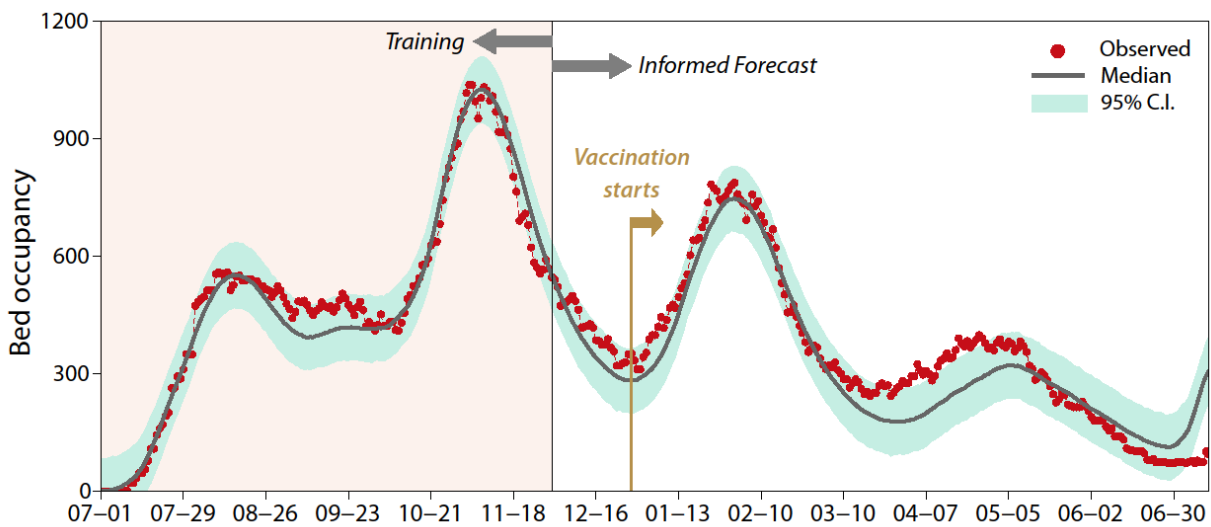

126  
 127 Figure S10: Daily number of beds occupied by COVID-19 patients in Aragon using an Exponential distribution for  
 128 the admission delay and a Gamma distribution for the LoS.

129  
 130
